# Supplementary material for: Quantifying malabsorption after Roux-en-Y gastric bypass and sleeve gastrectomy using near infrared spectroscopy
Source: Research Square preprint supplement (doi:10.21203/rs.3.rs-6810015/v1), 2025-06-17
Supplement: Supplementary file 1 [file c8260865347484c7b43c7fc6.docx]

# Supplementary

## Methodology for Calculating Baecke Indices

### 1. Work_Index

The Work_Index was calculated using responses from eight work-related questions (Q2–Q8) of the Baecke Physical Activity Questionnaire. Each question was scored on a scale from 0 (least activity) to 4 (most activity), except for sitting at work (Q2), which was inversely scored as 6 - response.

Formula:
Work_Index = (Q2 (6 - SittingAtWork) + Q3 (StandingAtWork) + Q4 (WalkingAtWork) + Q5 (HeavyLiftingAtWork) + Q6 (PhysicalTirednessAfterWork) + Q7 (SweatingAtWork) + Q8 (WorkComparedToPeers)) / 8

Questions:
- Q2: During my work, I sit...
 Response: 0 = never, 1 = seldom, 2 = sometimes, 3 = often, 4 = always.
- Q3: During my work, I stand...
 Response: 0 = never, 1 = seldom, 2 = sometimes, 3 = often, 4 = always.
- Q4: During my work, I walk...
 Response: 0 = never, 1 = seldom, 2 = sometimes, 3 = often, 4 = always.
- Q5: I lift heavy loads during work...
 Response: 0 = never, 1 = seldom, 2 = sometimes, 3 = often, 4 = always.
- Q6: After my work, I feel physically tired...
 Response: 0 = very often, 1 = often, 2 = sometimes, 3 = seldom, 4 = never.
- Q7: During my work, I sweat...
 Response: 0 = very often, 1 = often, 2 = sometimes, 3 = seldom, 4 = never.
- Q8: Compared to others of my age, my work is physically...
 Response: 0 = much heavier, 1 = heavier, 2 = equally heavy, 3 = lighter, 4 = much lighter.

### 2. Sport_Index

The Sport_Index was calculated based on responses to questions about time spent in sports activities for both a main and, if applicable, a secondary sport (Q9). Responses included hours per week (0–4) and months per year (0–4). If only one sport was reported, the formula used the main sport's contribution only.

Formula:
Sport_Index = ((Q9_HoursPerWeek_Main × Q9_MonthsPerYear_Main) + (Q9_HoursPerWeek_Second × Q9_MonthsPerYear_Second)) / Number of Sports

Questions:
- Q9.1: How many hours per week do you spend on your main sport?
 Response: 0 = less than 1 hour, 1 = 1–2 hours, 2 = 2–3 hours, 3 = 3–4 hours, 4 = more than 4 hours.
- Q9.2: How many months per year do you spend on your main sport?
 Response: 0 = less than 1 month, 1 = 1–3 months, 2 = 4–6 months, 3 = 7–9 months, 4 = 10–12 months.
- Q9.3: If applicable, how many hours per week do you spend on a second sport?
 Response: As above.
- Q9.4: If applicable, how many months per year do you spend on a second sport?
 Response: As above.

### 3. Leisure_Time_Index

The Leisure_Time_Index was calculated based on four leisure-related questions (Q10–Q13). Responses were scored on a scale from 0 (least activity) to 4 (most activity). Watching TV (Q13) was inversely scored as 6 - response.

Formula:
Leisure_Time_Index = ((6 - Q13_TVWatching) + Q10_PhysicalActivityComparedToPeers + Q11_SweatingInLeisure + Q12_DoingSportsInLeisure) / 4

Questions:
- Q10: Compared to others of my age, I think my leisure-time activity is...
 Response: 0 = much less active, 1 = less active, 2 = equally active, 3 = more active, 4 = much more active.
- Q11: During my leisure time, I sweat...
 Response: 0 = never, 1 = seldom, 2 = sometimes, 3 = often, 4 = very often.
- Q12: During my leisure time, I do sports...
 Response: 0 = never, 1 = seldom, 2 = sometimes, 3 = often, 4 = always.
- Q13: During my leisure time, I watch TV...
 Response: 0 = never, 1 = seldom, 2 = sometimes, 3 = often, 4 = always.

### 4. PA_Total

The PA_Total was calculated as the sum of the Work_Index, Sport_Index, and Leisure_Time_Index.

Formula:
PA_Total = Work_Index + Sport_Index + Leisure_Time_Index
