# Supplementary material for: Quantifying malabsorption after Roux-en-Y gastric bypass and sleeve gastrectomy using near infrared spectroscopy
Source: Research Square preprint supplement (doi:10.21203/rs.3.rs-6810015/v1), 2025-06-17
Supplement: Supplementary file 2 [file fe3397c77a75748638682cdf.docx]

# Supplementary

**Methodology for Categorizing Stool Consistency Using the Bristol Stool Form Scale**

**1. Bristol Stool Classification**

Stool consistency was assessed using the **Bristol Stool Form Scale (BSFS)**, a validated clinical tool that categorizes stool form into seven distinct types based on shape and consistency. Each type reflects gastrointestinal transit time and hydration status of the stool.

Patients were asked to classify each stool sample during the collection period (days 4–6) using the BSFS. Classification was guided using a visual chart provided at study enrollment.

| **Type** | **Description** | **Interpretation** |
| --- | --- | --- |
| 1 | Separate hard lumps, like nuts | **Severe constipation** |
| 2 | Sausage-shaped but lumpy | **Mild constipation** |
| 3 | Like a sausage but with cracks | **Healthy** |
| 4 | Like a smooth, soft sausage | **Healthy** |
| 5 | Soft blobs with clear-cut edges | **Lacking fiber** |
| 6 | Fluffy pieces with ragged edges | **Mild diarrhea** |
| 7 | Watery, no solid pieces | **Severe diarrhea** |

**2. Categorization for Statistical Analysis**

For analysis, stool types were grouped as follows:

- **Hard stools (Types 1–2):** Indicative of slowed intestinal transit.
- **Healthy stools (Types 3–4):** Considered optimal consistency.
- **Loose stools (Types 5–6):** May reflect accelerated transit or low fiber.
- **Diarrhea (Type 7):** Suggests rapid transit or malabsorption.

The **modal stool type** across the three collection days was used to assign each participant to a stool category.

**3. Application in Study**

All patients were instructed to log each bowel movement’s BSFS type using a standardized stool diary. These records were reviewed and validated by the research team. Where discrepancies occurred or data were missing, the most frequent classification was used for categorization
